# Supplementary material
Source: PubMed Central journal article supplement (PMC9295558)
Supplement: aac.00287-22-s0001.pdf [file aac.00287-22-s0001.pdf]

## **Supplementary Material**

**Supplement Figure 1** Standardized Mean Differences Comparing the Full Unmatched Cohort with the Propensity Score-Matched Cohort

**Supplement Figure 2** Probability of 7-Day Survival in the Propensity Score-Matched Cohort

**Supplement Figure 3** Probability of 14-Day Survival in the Propensity Score-Matched Cohort

**Supplement Table 1** Cox Regression Analyses of Seven-Day All -Cause Mortality in the Propensity Score-Matched Cohort

**Supplement Table 2** Cox Regression Analyses of Fourteen-Day All -Cause Mortality in the Propensity Score-Matched Cohort

**Supplement Table 3** Logistic Regression Analyses of Thirty-Day All -Cause Mortality in the Propensity Score-Matched Cohort

**Supplement Table 4** Risk of Acquisition of Carbapenem-resistant Enterobacteriaceae, *Acinetobacter*, *Pseudomonas* species and *C. difficile* Between Ertapenem and Other Carbapenems in the Propensity Score-Matched Cohort

**Supplement Figure 1** Standardized Mean Differences Comparing the Full Unmatched Cohort with the Propensity Score-Matched Cohort.

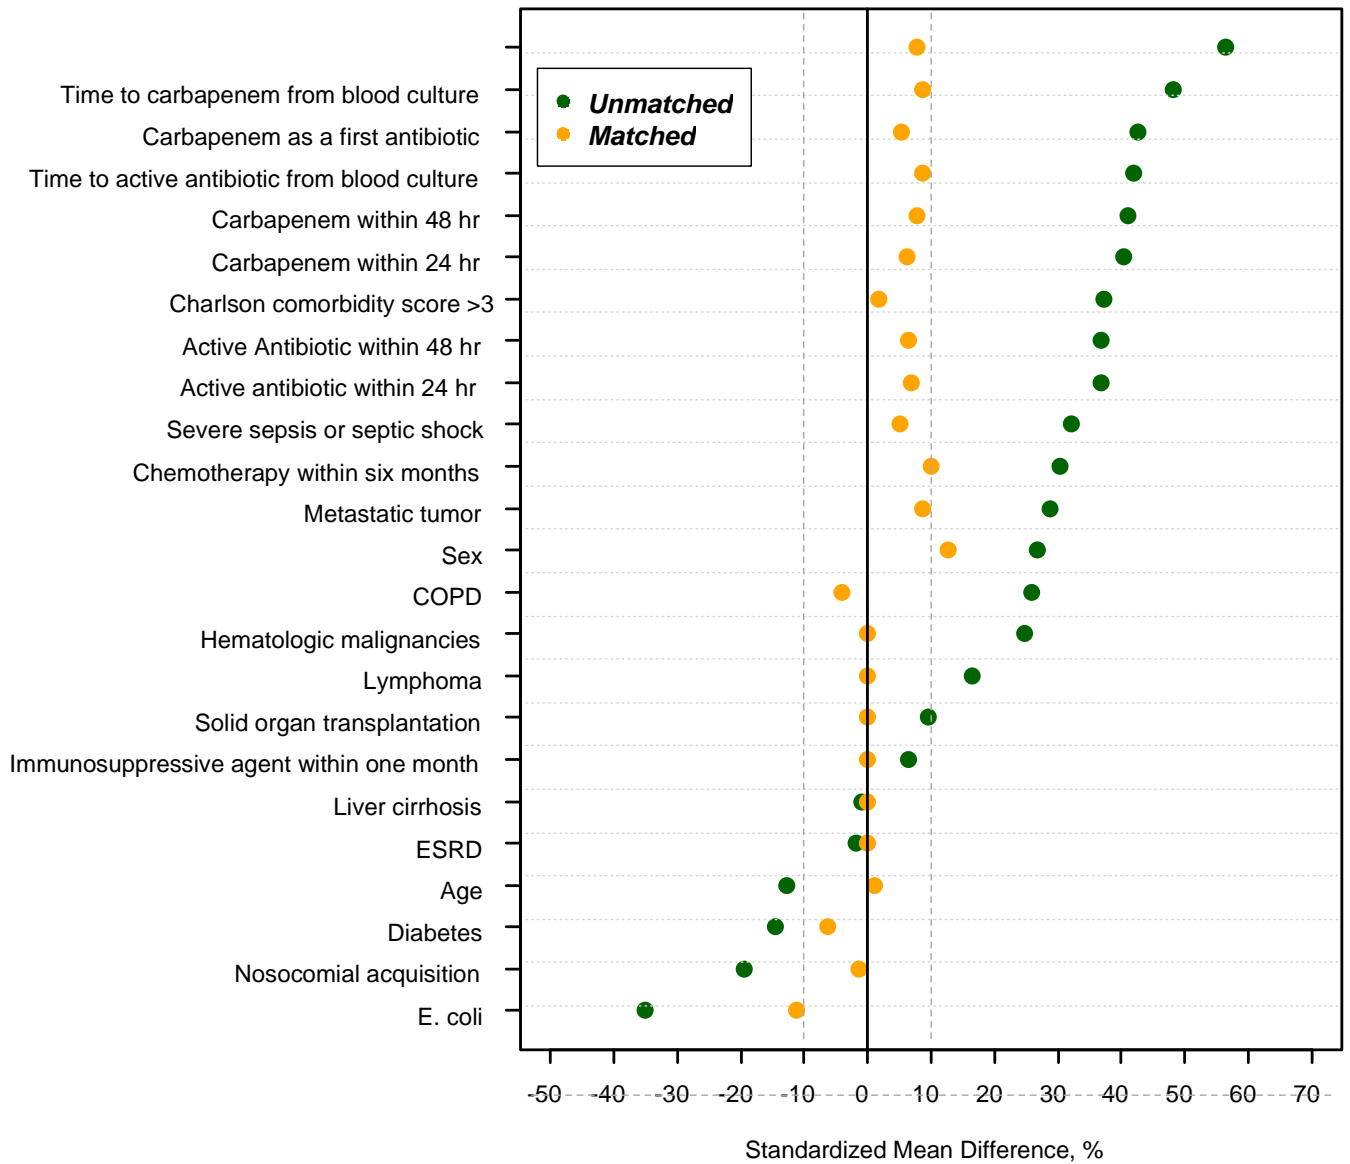

ICU, intensive care unit; COPD, chronic obstructive lung disease; ESRD, end-stage renal disease.

**Supplement Figure 2** Probability of 7-Day Survival in the Propensity Score-Matched Cohort

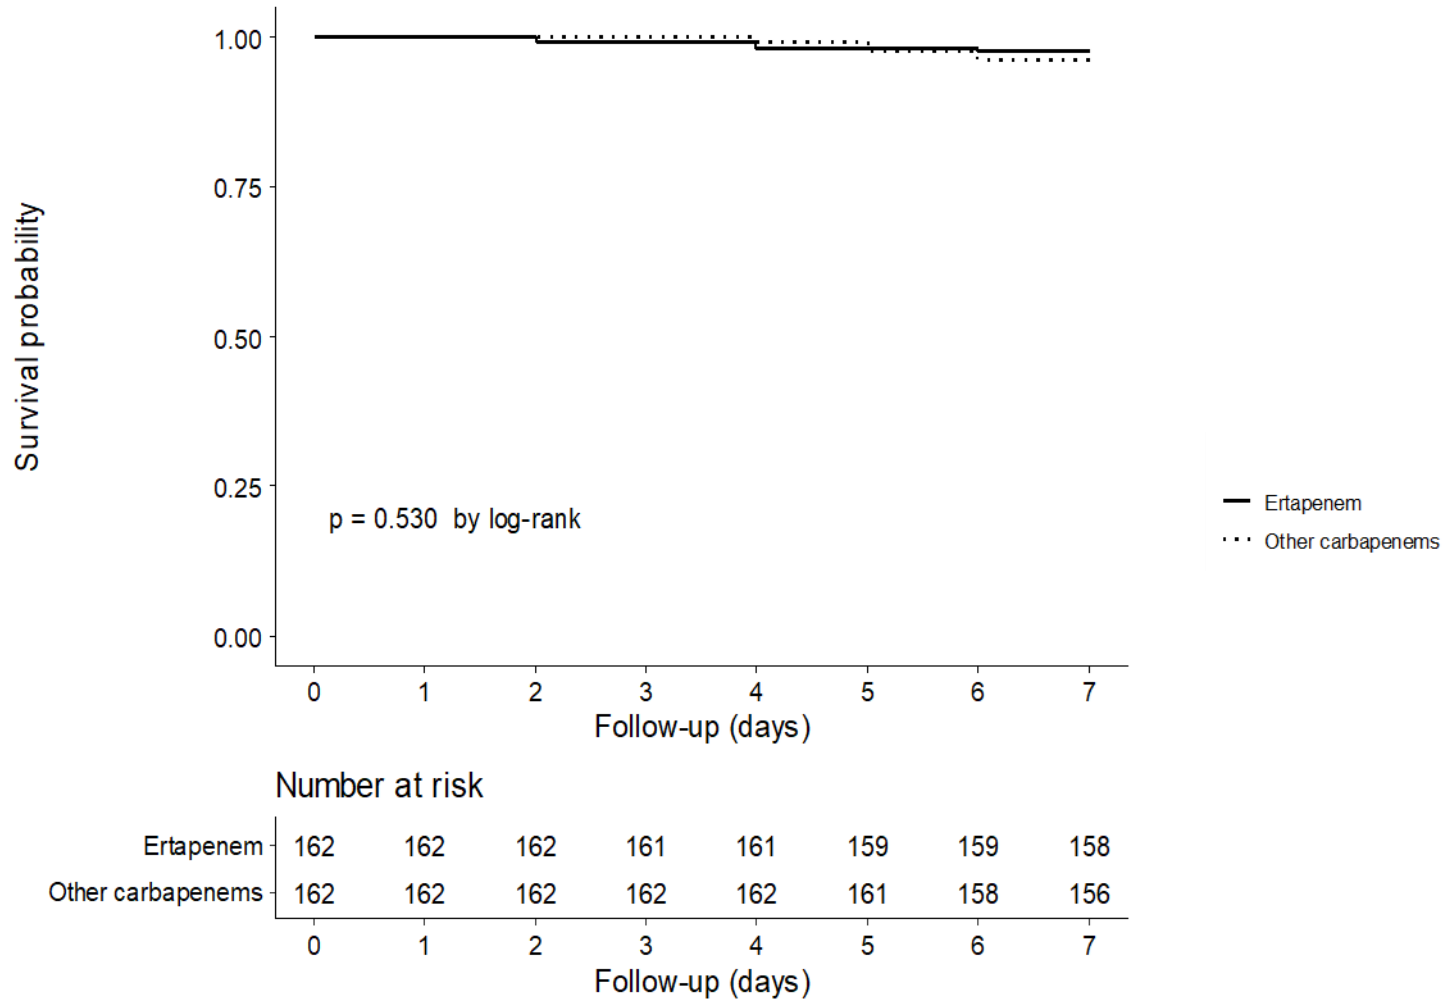

**Supplement Figure 3** Probability of 14-Day Survival in the Propensity Score-Matched Cohort

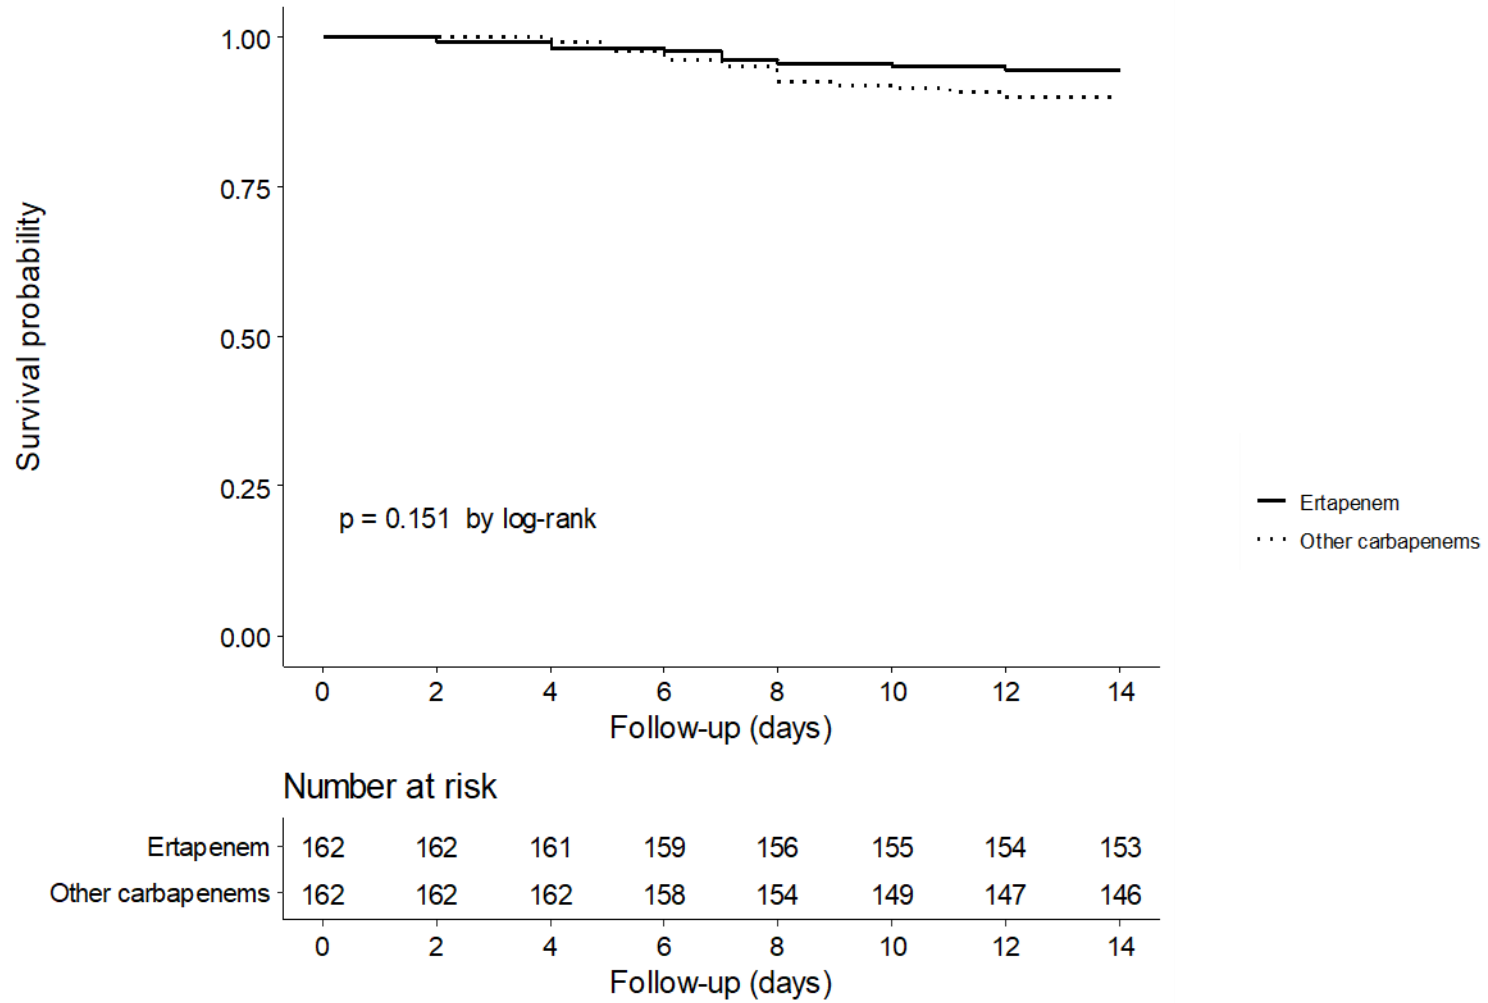

**Supplement Table 1 Cox Regression Analyses of Seven-Day All -Cause Mortality in the Propensity Score-Matched Cohort**

| Variable                       | Unadjusted HR (95% CI) | <i>P</i> | Adjust HR <sup>a</sup> (95% CI) | <i>P</i> |
|--------------------------------|------------------------|----------|---------------------------------|----------|
| <i>E. coli</i>                 | 0.23 (0.06–0.80)       | 0.021    | 0.28 (0.06–1.34)                | 0.11     |
| Nosocomial acquisition         | 4.75 (1.34–16.84)      | 0.016    | 3.08 (0.79–12.09)               | 0.11     |
| Underlying disease             |                        |          |                                 |          |
| Diabetes mellitus              | 0.35 (0.07–1.64)       | 0.18     | 0.26 (0.05–1.35)                | 0.11     |
| Solid tumor, localized         | 2.98 (0.84–10.56)      | 0.091    | 1.73 (0.43–7.03)                | 0.44     |
| Metastatic solid tumor         | 5.79 (1.63–20.51)      | 0.007    | 1.13 (0.09–13.96)               | 0.92     |
| Chemotherapy within six months | 3.81 (0.99–14.74)      | 0.053    | 1.77 (0.25–12.52)               | 0.57     |
| Charlson comorbidity score     | 1.43 (1.13–1.81)       | 0.0028   | 1.28 (0.89–1.85)                | 0.18     |
| Source of infection            |                        | 0.22     |                                 |          |
| Urinary tract                  | Reference              |          | Reference                       |          |
| Biliary                        | 2.86 (0.52–15.61)      | 0.23     |                                 |          |
| Others                         | 3.21 (0.80–12.82)      | 0.10     |                                 |          |

|                                |                   |       |                   |       |
|--------------------------------|-------------------|-------|-------------------|-------|
| Severe sepsis or septic shock  | 6.81 (0.86–53.76) | 0.069 | 6.84 (0.83–56.24) | 0.074 |
| Carbapenem as first antibiotic | 1.59 (0.45–5.65)  | 0.47  |                   |       |
| Carbapenem                     |                   |       |                   |       |
| Other carbapenem               | Reference         |       | Reference         |       |
| Ertapenem                      | 0.67 (0.19–2.37)  | 0.54  | 0.78 (0.19–3.22)  | 0.73  |

HR, hazard ratio; CI, confidence interval.

<sup>a</sup>Adjusted for variables with  $P < 0.20$  in univariate analysis

**Supplement Table 2 Cox Regression Analyses of Fourteen-Day All -Cause Mortality in the Propensity Score-Matched Cohort**

| Variable                            | Unadjusted HR (95% CI) | <i>P</i> | Adjust HR <sup>a</sup> (95% CI) | <i>P</i> |
|-------------------------------------|------------------------|----------|---------------------------------|----------|
| Age (years) (mean ±SD)              | 0.97 (0.95–1.00)       | 0.060    | 0.97 (0.92–1.02)                | 0.18     |
| Male sex                            | 1.95 (0.88–4.29)       | 0.098    | 0.87 (0.32–2.31)                | 0.77     |
| <i>E. coli</i>                      | 0.26 (0.11–0.58)       | 0.001    | 0.33 (0.13–0.89)                | 0.028    |
| Nosocomial acquisition              | 4.96 (2.23–11.03)      | 0.0001   | 2.90 (1.15–7.28)                | 0.024    |
| <b>Underlying disease</b>           |                        |          |                                 |          |
| Liver cirrhosis                     | 3.05 (1.05–8.90)       | 0.041    | 1.54 (0.35–6.78)                | 0.57     |
| Solid tumor, localized              | 2.55 (1.13–5.77)       | 0.025    | 1.63 (0.64–4.19)                | 0.31     |
| Metastatic solid tumor              | 5.29 (2.33–11.97)      | 0.0001   | 2.78 (0.57–13.61)               | 0.21     |
| Chemotherapy within six months      | 3.65 (1.53–8.75)       | 0.0036   | 1.26 (0.33–4.89)                | 0.74     |
| Charlson comorbidity score (median) | 1.29 (1.10–1.50)       | 0.0012   | 1.12 (0.85–1.48)                | 0.42     |
| <b>Source of infection</b>          |                        |          |                                 |          |
| Urinary tract                       | Reference              | 0.0014   | Reference                       | 0.85     |

|                               |                   |        |                   |       |
|-------------------------------|-------------------|--------|-------------------|-------|
| Biliary                       | 1.94 (0.53–7.18)  | 0.32   | 1.10 (0.25–4.93)  | 0.90  |
| Other                         | 4.79 (2.05–11.20) | 0.0003 | 1.35 (0.47–3.91)  | 0.58  |
| Pitt bacteremia score         | 1.30 (1.06–1.59)  | 0.011  | 1.32 (1.02–1.70)  | 0.032 |
| Severe sepsis or septic shock | 5.72 (1.71–19.12) | 0.0046 | 5.25 (1.45–19.01) | 0.012 |
| Carbapenem                    |                   |        |                   |       |
| Other carbapenem              | Reference         |        | Reference         |       |
| Ertapenem                     | 0.56 (0.25–1.26)  | 0.16   | 0.60 (0.24–1.48)  | 0.26  |

HR, hazard ratio; CI, confidence interval; ESRD, end-stage renal disease; COPD, chronic obstructive pulmonary disease; ICU, intensive care unit

<sup>a</sup>Adjusted for variables with  $P < 0.20$  in univariate analysis



**Supplement Table 3 Logistic Regression Analyses of Thirty-Day All -Cause Mortality in the Propensity Score-Matched Cohort**

| Variable                       | Unadjusted OR (95% CI) | <i>P</i> | Adjust OR <sup>a</sup> (95% CI) | <i>P</i> |
|--------------------------------|------------------------|----------|---------------------------------|----------|
| Male sex                       | 1.78 (0.91–3.45)       | 0.091    | 0.99 (0.40–2.45)                | 0.99     |
| <i>E. coli</i>                 | 0.22 (0.10–0.47)       | <0.0001  | 0.34 (0.13–0.91)                | 0.032    |
| Nosocomial acquisition         | 4.87 (2.45–9.68)       | <0.0001  | 3.50 (1.44–8.47)                | 0.006    |
| Underlying disease             |                        |          |                                 |          |
| Liver cirrhosis                | 3.40 (1.23–9.45)       | 0.019    | 2.23 (0.54–9.25)                | 0.27     |
| ESRD                           | 7.42 (1.02–54.23)      | 0.048    | 6.96 (0.33–146.08)              | 0.21     |
| Solid tumor, localized         | 3.11 (1.52–6.34)       | 0.002    | 2.23 (0.87–5.71)                | 0.097    |
| Metastatic solid tumor         | 7.11 (3.22–15.71)      | <0.0001  | 7.42 (1.54–35.68)               | 0.012    |
| Chemotherapy within six months | 3.78 (1.65–8.70)       | 0.002    | 1.14 (0.30–4.33)                | 0.85     |
| Charlson comorbidity score     | 1.41 (1.22–1.63)       | <0.0001  | 1.06 (0.84–1.33)                | 0.64     |
| Source of infection            |                        | <0.0001  |                                 | 0.33     |
| Urinary tract                  | Reference              |          | Reference                       |          |

|                               |                   |         |                   |       |
|-------------------------------|-------------------|---------|-------------------|-------|
| Biliary                       | 2.20 (0.74–6.50)  | 0.79    | 1.38 (0.33–5.79)  | 0.93  |
| Others                        | 6.35 (3.01–13.38) | <0.0001 | 2.16 (0.81–5.71)  | 0.22  |
| Pitt bacteremia score         | 1.32 (1.09–1.59)  | 0.004   | 1.38 (1.06–1.81)  | 0.017 |
| Severe sepsis or septic shock | 4.04 (1.73–9.43)  | 0.001   | 4.35 (1.44–13.14) | 0.009 |
| Carbapenem                    |                   |         |                   |       |
| Other carbapenem              | Reference         |         | Reference         |       |
| Ertapenem                     | 0.56 (0.28–1.11)  | 0.094   | 0.56 (0.23–1.37)  | 0.20  |

OR, odds ratio; CI, confidence interval; ESRD, end-stage renal disease.

<sup>a</sup>Adjusted for variables with  $P < 0.20$  in univariate analysis

**Supplement Table 4. Risk of Acquisition of Carbapenem-resistant Enterobacteriaceae, *Acinetobacter*, *Pseudomonas* species and *C. difficile* Between Ertapenem and Other Carbapenems in the Propensity Score-Matched Cohort**

|                                                                         | Ertapenem<br>(n =162) | Other carbapenems<br>(n =152) | OR (95% CI)      | <i>P</i> value |
|-------------------------------------------------------------------------|-----------------------|-------------------------------|------------------|----------------|
| Carbapenem-resistant Enterobacteriaceae                                 | 11 (6.8)              | 8 (5.3)                       | 1.31 (0.51-3.53) | 0.37           |
| Carbapenem-resistant <i>Acinetobacter</i> or <i>Pseudomonas</i> species | 8 (4.9)               | 21 (13.8)                     | 0.36 (0.15–0.83) | 0.017          |
| <i>C. difficile</i> infection*                                          | 13 (8.1)              | 13 (8.0)                      | 0.99 (0.44–2.20) | 0.98           |

OR, odds ratio; CI, confidence interval.

The number of patients was calculated after excluding patients who were already colonized with carbapenem-resistant Enterobacteriaceae, carbapenem-resistant *Acinetobacter* or *Pseudomonas* species

\*The number of patients for comparing the development of *C. difficile* infection was 160 in ertapenem and 162 in other carbapenem group
